# Supplementary material for: MAP3Kε1/2 Interact with MOB1A/1B and Play Important Roles in Control of Pollen Germination through Crosstalk with JA Signaling in Arabidopsis
Source: MDPI journal article supplement (doi:10.3390/ijms23052683), 2022-02-28
Supplement: s1 [file s1]

Figure. S1

A

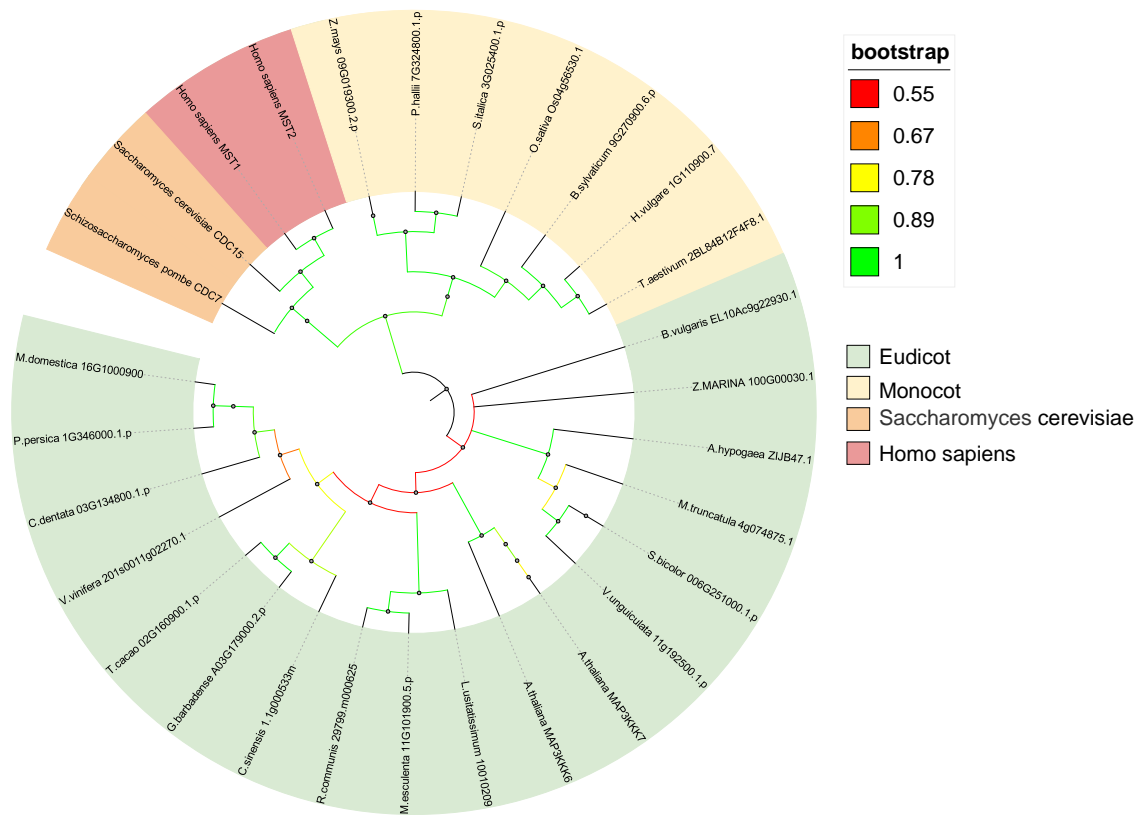

B

|                                   |     | STKc_Cdc7_like           |      |      |             |              |       |          |       |             |     |  |  |
|-----------------------------------|-----|--------------------------|------|------|-------------|--------------|-------|----------|-------|-------------|-----|--|--|
|                                   |     | #####                    | #    | #    | #           | #####        | ##    | #        | ##### | #           |     |  |  |
| MAP3Kε1  Arabidopsis              | 22  | LGDEIGKGAYGRV----        | AIK  | ---  | NIVKYL      | GSS-TKTHLHI  | LEYV  | ENGSLANI | ---   | HRDIKGANIL  | 151 |  |  |
| MAP3Kε2  Arabidopsis              | 22  | LGDEIGKGAYGRV----        | AIK  | ---  | NIVKYL      | GSL-TKTHLHI  | LEYV  | ENGSLANI | ---   | HRDIKGANIL  | 151 |  |  |
| ZmPHJ40.09G019300.2.p  Z.mays PHJ | 22  | LGDEIGKGAYGRV----        | AIK  | ---  | NIVKYL      | GSL-TKSHLHI  | LEYV  | ENGSLANI | ---   | HRDIKGANIL  | 151 |  |  |
| LOC_Os04g56530.1 O.sativa         | 22  | LGDEIGKGAYGRV----        | AIK  | ---  | NIVKYL      | GSL-TRSHLHI  | LEYV  | ENGSLANI | ---   | HRDIKGANIL  | 151 |  |  |
| Glyma.11G101700.4.p G.maxWm       | 22  | LGDEIGKGAYGRV----        | AIK  | ---  | NIVKYL      | GSS-KSHLHIV  | LEYV  | ENGSLANI | ---   | HRDIKGANIL  | 151 |  |  |
| CDC15  Saccharomyces cerevisiae   | 27  | LKQVIGRGSYGVV----        | AIK  | ---  | NIVKYH      | GFI-KSYELYI  | LEYC  | ANGSLRRL | ---   | HRDIKAA NIL | 153 |  |  |
| CDC7  Schizosaccharomyces pombe   | 11  | LGDCLGKGAFGAV----        | AVK  | ---  | NIVKYR      | GSY--NDSLCII | LEYC  | ENGSLRSI | ---   | HRDIKGANIL  | 138 |  |  |
|                                   |     | ##                       | #    |      | #####       | #            |       |          |       |             |     |  |  |
| MAP3Kε1  Arabidopsis              | 152 | TTKEGLVKLADFGVATKL---    | NTHS | VVGT | PYWMAPE---- | TVIELLTC     | VPPY  | YDLQPMP  |       |             | 226 |  |  |
| MAP3Kε2  Arabidopsis              | 152 | TTKEGLVKLADFGVATKL---    | NTHS | VVGT | PYWMAPE---- | TVIELLTC     | VPPY  | YDLQPMP  |       |             | 226 |  |  |
| ZmPHJ40.09G019300.2.p  Z.mays PHJ | 152 | TTKEGLVKLADFGVATKL---    | NTHS | VVGT | PYWMAPE---- | TVIELLTC     | VPPY  | YDLQPMP  |       |             | 226 |  |  |
| LOC_Os04g56530.1 O.sativa         | 152 | TTKEGLVKLADFGVATKL---    | NTHS | VVGT | PYWMAPE---- | TVIELLTC     | VPPY  | YDLQPMP  |       |             | 226 |  |  |
| Glyma.11G101700.4.p G.maxWm       | 152 | TTKEGLVKLADFGVATKL---    | NTHS | VVGT | PYWMAPE---- | TVIELLTC     | VPPY  | YDLQPMP  |       |             | 226 |  |  |
| CDC15  Saccharomyces cerevisiae   | 154 | LSADNTVKLADFGVSTIVNSSALT | LAGT | LN   | WMAPE---    | TVVEMLT      | KNPPY | HNLT     | DAN   |             | 225 |  |  |
| CDC7  Schizosaccharomyces pombe   | 139 | TTKDGTIKLADFGVATKI---    | EDHS | VVGS | PYWMAPE---- | TVIELLDG     | NPPY  | YDL      | DPTS  |             | 211 |  |  |

**Figure S1.** A phylogenetic analysis of the MAP3Kε family. **A:** Phylogenetic relationships of members of the MAP3Kε family. Rooted circular phylogram representation of the consensus tree generated by the neighbor-joining method (500 bootstraps) on the conserved regions of proteins from the MAP3Kε family. Triangle represents NJ bootstrap values > 50. numbers after the abbreviated species names are internal. The aqua represents eudicot, the buff represents monocot, salmon pink represents *Saccharomyces cerevisiae*, the rose represents *Homo sapiens*. The bootstrap represents similarity, rendered with a color gradient. **B:** The conserved regions of MAP3Kε from Arabidopsis thaliana and examples from other representative taxa.

**Figure. S2**

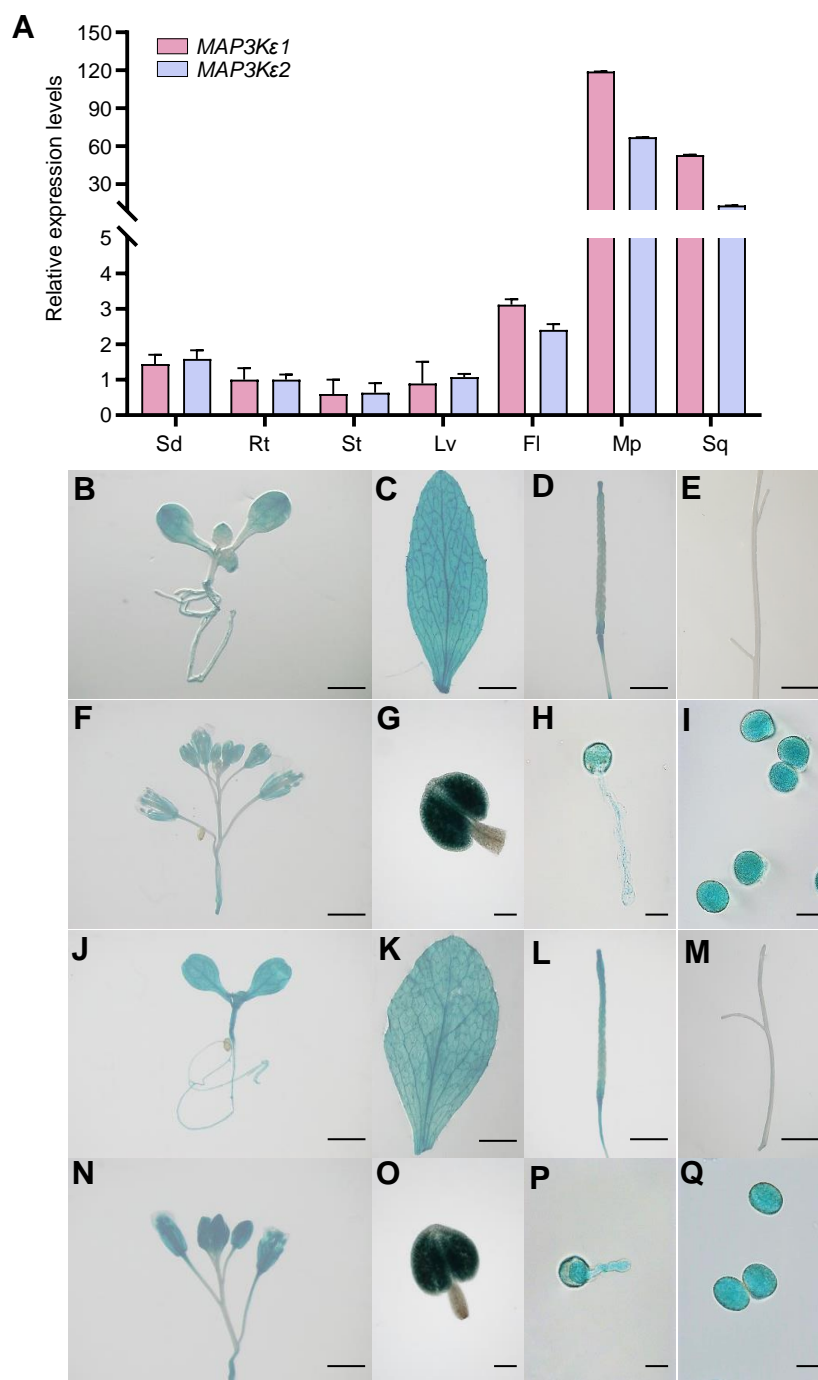

**Figure S2.** Expression patterns and levels of *MAP3Kε1* and *MAP3Kε2*. **A**: Quantitative real-time PCR showing the expression levels of the *MAP3Kε1* and *MAP3Kε2* in different tissues from Arabidopsis. Sd, seedlings; Rt, root; St, steam; Lv, leaves; Fl, flower; Mp, mature; Sq, silique. Each bar represents the mean  $\pm$  SEM of three independent experiments. **B-I**: The *GUS* expression patterns of pMAP3Kε1::GUS transgenic lines. **J-Q**: The *GUS* expression patterns of pMAP3Kε2::GUS transgenic lines. Seedlings (**B**, **J**); leaves (**C**, **K**); siliques (**D**, **L**); stems (**E**, **M**); inflorescences (**F**, **N**); anthers (**G**, **O**); pollen tubes (**H**, **P**); mature pollens (**I**, **Q**). The scale bars : 2 mm for (**B-F**) and (**J-N**), 100 μm for (**G-I**) and (**P-Q**).

**Figure. S3**

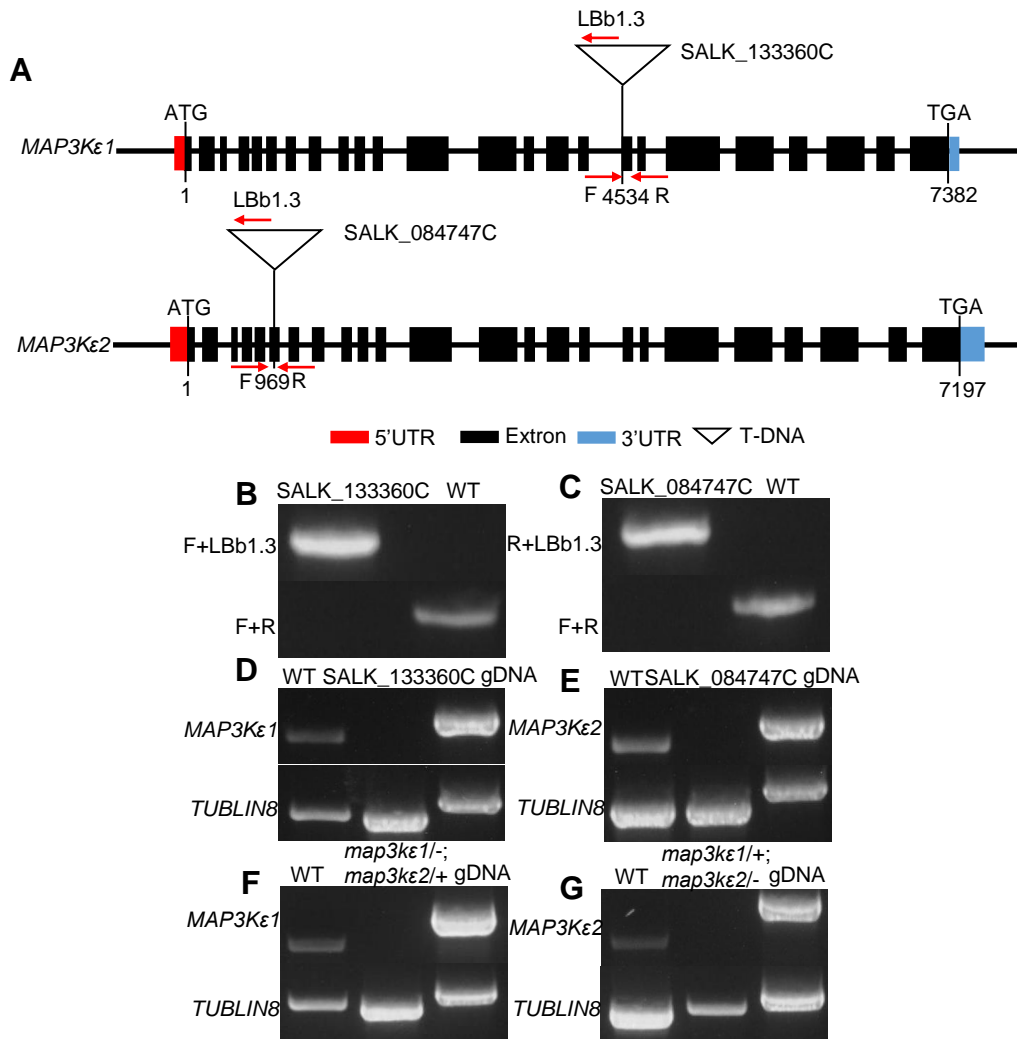

**Figure S3.** Molecular characterization of *map3kε1*, *map3kε2* mutants. **A:** The schematic diagrams of the *MAP3Kε1*, *MAP3Kε2* structures and T-DNA insertion sites in the mutants. Red arrows represent primers. **B:** Confirmation of the T-DNA insertion in *map3kε1* by PCR. **C:** Confirmation of the T-DNA insertion in *map3kε2* by PCR. **D:** The relative expression levels of *MAP3Kε1* genes in wild-type (WT) and SALK\_133360C mutant by RT-PCR. **E:** The relative expression levels of *MAP3Kε2* genes in wild-type (WT) and SALK\_084747C mutant by RT-PCR. **F:** The relative expression levels of *MAP3Kε1* genes in wild-type (WT) and *map3kε1*<sup>-/-</sup>; *map3kε2*<sup>+/+</sup> mutant by RT-PCR. **G:** The relative expression levels of *MAP3Kε2* genes in wild-type (WT) and *map3kε1*<sup>+/+</sup>; *map3kε2*<sup>-/-</sup> mutant by RT-PCR. *TUBLIN8* used for control.

**Figure. S4**

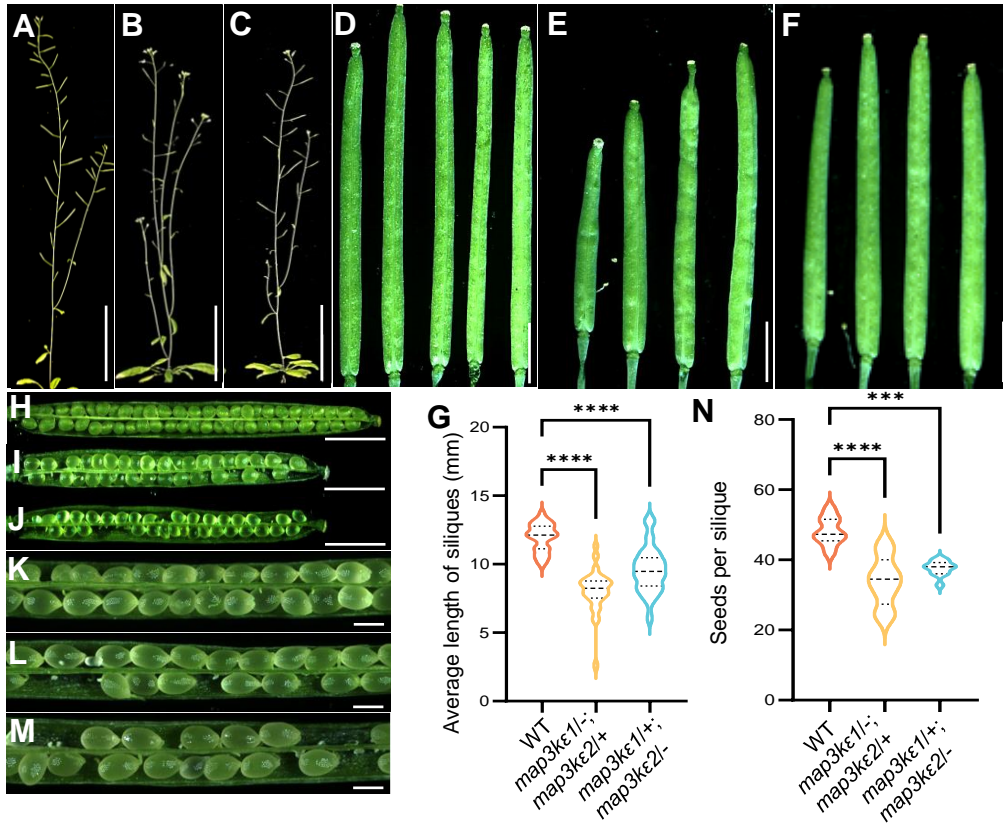

**Figure S4.** The *map3kε1*<sup>-/-</sup>; *map3kε2*<sup>+/+</sup> and *map3kε1*<sup>+/+</sup>; *map3kε2*<sup>-/-</sup> mutants reduced fertility. **A-C:** The vegetative and reproductive growth patterns of wild-type (WT) (A) and the *map3kε1*<sup>-/-</sup>; *map3kε2*<sup>+/+</sup> (B) and *map3kε1*<sup>+/+</sup>; *map3kε2*<sup>-/-</sup> (C) mutant plants. **D-F:** The siliques length from wild-type (WT) plants (D), *map3kε1*<sup>-/-</sup>; *map3kε2*<sup>+/+</sup> (E) plants and *map3kε1*<sup>+/+</sup>; *map3kε2*<sup>-/-</sup> (F) plants. **G:** Comparison silique length in wild-type (WT) , *map3kε1*<sup>-/-</sup>; *map3kε2*<sup>+/+</sup> and *map3kε1*<sup>+/+</sup>; *map3kε2*<sup>-/-</sup>. **H-M:** The silique with seed set from wild-type (WT) (H, K) and the *map3kε1*<sup>-/-</sup>; *map3kε2*<sup>+/+</sup> (I, L) and *map3kε1*<sup>+/+</sup>; *map3kε2*<sup>-/-</sup> (J, M) mutant plants. **N:** Comparison seeds per silique in wild-type (WT) , *map3kε1*<sup>-/-</sup>; *map3kε2*<sup>+/+</sup> and *map3kε1*<sup>+/+</sup>; *map3kε2*<sup>-/-</sup>, each bar represents the mean  $\pm$  SD of three independent experiments. Different letters represent significant difference at \*\*\* $p < 0.001$ , \*\*\*\* $p < 0.0001$  (one-way ANOVA, Tukey post-test). Bars = 1mm in (K-M), Bars = 2 mm in (D-J), Bar=5 cm in (A-C).

**Figure. S5**

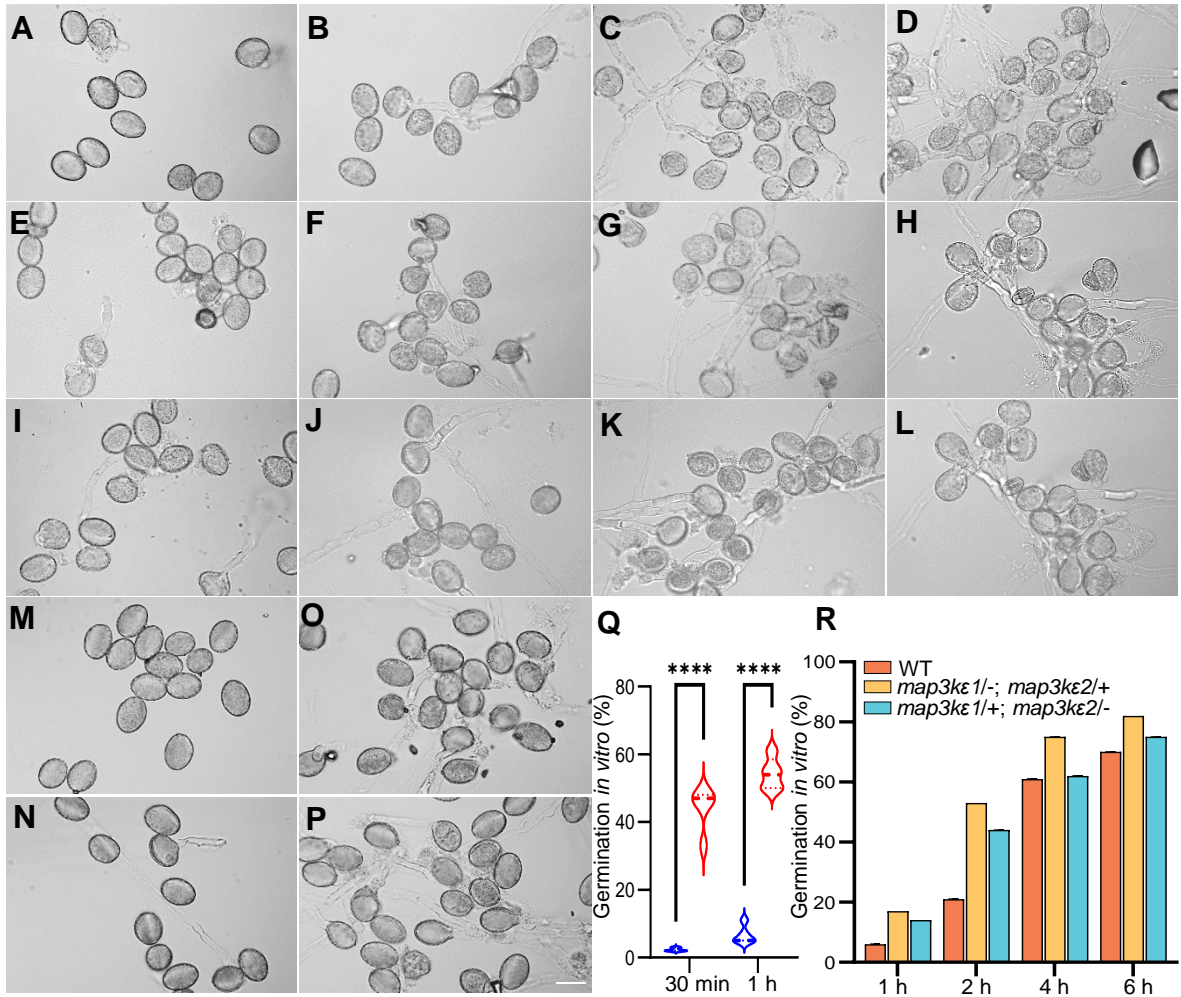

**Figure S5.** Arabidopsis pollen germinated *in vitro*. **A-D:** The wild-type (WT) pollen grains germinated *in vitro* at 1h, 2h, 4h, 6h respectively. **E-H:** The *map3kε1/-; map3kε2/+* pollen grains germinated *in vitro* at 1h, 2h, 4h, 6h respectively. **I-L:** The *map3kε1/+; map3kε2/-* pollen grains germinated *in vitro* at 1h, 2h, 4h, 6h respectively. **M-N:** The wild-type (WT) pollen grains germinated *in vitro* with the most germination on the medium supplemented with 0 μM MeJA at 30 min and 1h, respectively. **O-P:** The wild-type (WT) pollen grains germinated *in vitro* with the most germination on the medium supplemented with 100 μM MeJA at 30 min and 1h, respectively. **Q:** Germination of wild-type (WT) pollen in standard germination medium supplemented with MeJA. **R:** Comparison pollen germination in wild-type (WT), *map3kε1/-; map3kε2/+* and *map3kε1/+; map3kε2/-*, each bar represents the mean ± SD of three independent experiments. Different letters represent significant difference at \*\*\*\* $p < 0.0001$  (one-way ANOVA, Tukey post-test). Bars = 20 μm (**A-P**).



Figure. S6

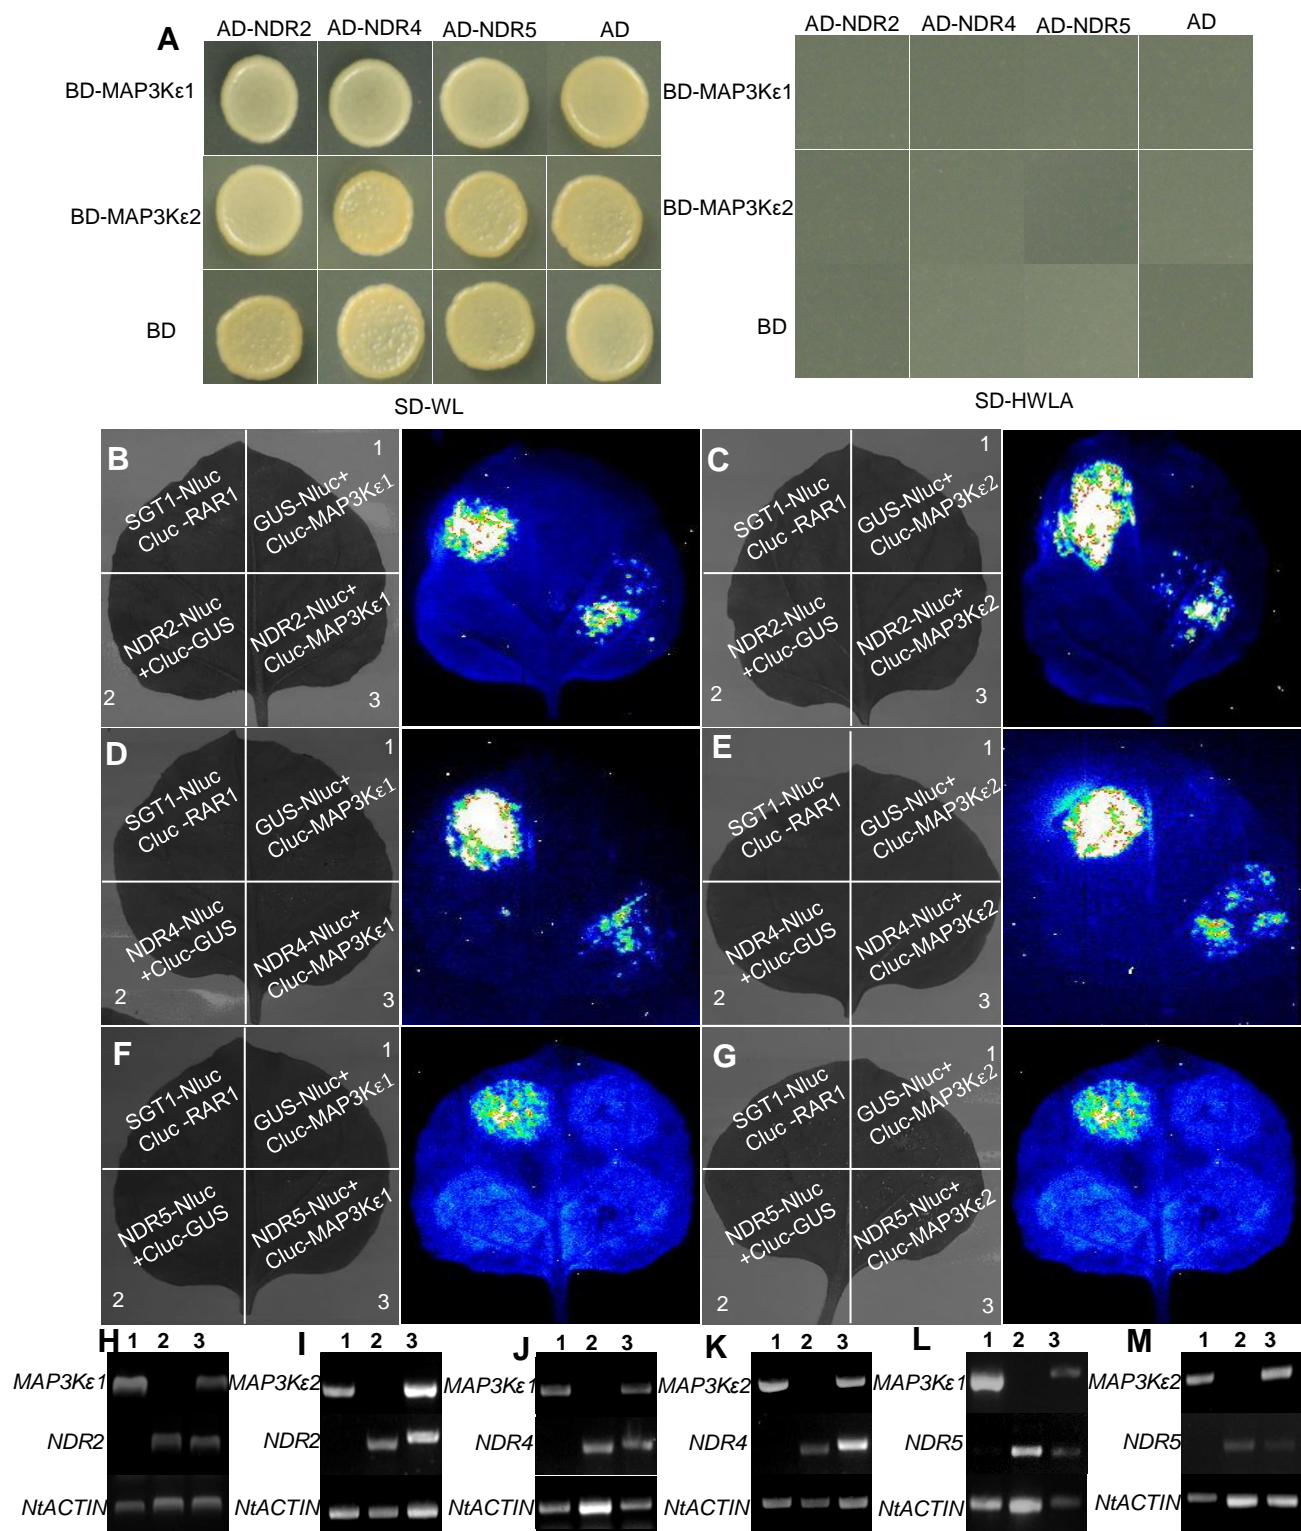

**Figure S6.** Yeast two-hybrid assay and LCI assay for MAP3K $\epsilon$ 1/2 protein and NDR2/4/5. **A:** MAP3K $\epsilon$ 1/ 2 can't interact with MOB in the yeast two-hybrid assay. Interaction was determined by yeast growth on the medium lacking His (H), Trp (W) , Leu (L) and Ade(A). **B:** MAP3K $\epsilon$ 1 interacts with NDR2 in the luciferase complementation image (LCI) assays. **C:** MAP3K $\epsilon$ 2 interacts with NDR2 in the LCI assay. **D:** MAP3K $\epsilon$ 1 interacts with NDR4 in the LCI assay. **E:** MAP3K $\epsilon$ 2 interacts with NDR4 in the LCI assay. **F:** MAP3K $\epsilon$ 1 can't interact with NDR5 in the LCI assay. **G:** MAP3K $\epsilon$ 2 can't interact with NDR5 in the LCI assay. **H:** RT-PCR analysis for gene expression in the LCI assay of (**B**). The numbers represent different experimental combinations marked in (**B**). **I:** RT-PCR analysis for gene expression in the LCI assay of (**C**). The numbers represent different experimental combinations marked in (**C**). **J:** RT-PCR analysis for gene expression in the LCI assay of (**D**). The numbers represent different experimental combinations marked in (**D**). **K:** RT-PCR analysis for gene expression in the LCI assay of (**E**). The numbers represent different experimental combinations marked in (**E**). **L:** RT-PCR analysis for gene expression in the LCI assay of (**F**). The numbers represent different experimental combinations marked in (**F**). **M:** RT-PCR analysis for gene expression in the LCI assay of (**G**). The numbers represent different experimental combinations marked in (**G**). The expression of *Nicotiana benthamiana* gene *ACTIN* as a control for the internal standard.

**Figure. S7**

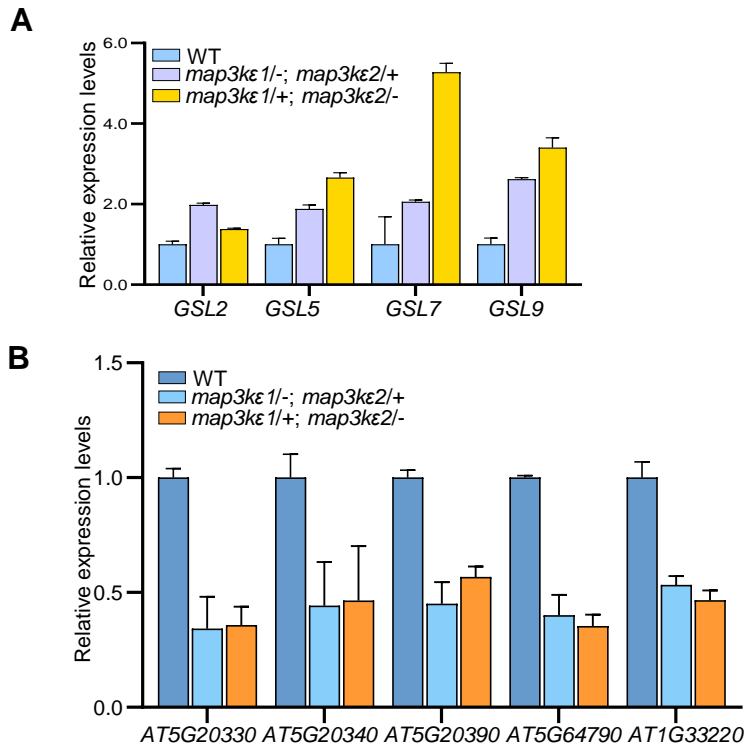

**Figure S8.** Expression of callose synthase and 1,3-glucanase genes were altered in the *map3kε1/-; map3kε2/+* and *map3kε1/+; map3kε2/-* mutant. **A:** Relative expression of *GSL2*, *GSL5*, *GSL7*, *GSL9* in mature pollen of wild-type (WT) and the *map3kε1/-; map3kε2/+* and *map3kε1/+; map3kε2/-* mutant plants. **B:** Relative expression of *AT5G20330* ( $\beta$ -1,3-glucanase), *AT5G20340* ( $\beta$ -1,3-glucanase), *AT5G20390* (glycosyl hydrolase), *AT5G64790* (o-glycosyl hydrolases), *AT1G33220* (glycosyl hydrolase) in mature pollen of wild type (WT) and the *map3kε1/-; map3kε2/+* and *map3kε1/+; map3kε2/-* mutant plants. *ACTIN2* was used as an internal control.



**Table S1. The sequences of the primers used in this study**

| Uses of the primers     | Names of the primers                | Sequences of the primers (5'-3')      |
|-------------------------|-------------------------------------|---------------------------------------|
| Mutant identification   | LBb1.3                              | ATTTTGCCGATTTTCGGAAC                  |
|                         | GK-LB                               | ATATTGACCATCATACTCATTGC               |
|                         | GK-719G04-LP                        | TGGATTTCAGGTTCATGGTTGA                |
|                         | GK-719G04-RP                        | TGCACTCTTCTTAGGTCGGA                  |
|                         | SALK_06207 0-LP-2                   | TTTGGAGGAAAAGCTGCACC                  |
|                         | SALK_06207 0-RP-2                   | ACTGCTGGTCCCAAGTACAG                  |
|                         | SALK_13336 0-F                      | GCAGGATTTTTGTTGTTGTCC                 |
|                         | SALK_13336 0-R                      | AATCATTTCTTGGGGTGGATC                 |
|                         | SALK_08474 7-F                      | TGGAAAACATTGGTCAAGAGG                 |
|                         | SALK_08474 7-R                      | AGGAATAGGAGGGGTATCATC                 |
| Complementati on assays | MAP3K $\epsilon$ 1-gus-cz-F((PstI)  | AAGCTTGCATGCCTGCAGCCGTGTTACCAACCA AAG |
|                         | MAP3K $\epsilon$ 1-gus-cz-R((BamHI) | CTGACCACCCGGGGATCCctcttctcgtttcttctt  |
|                         | MAP3K $\epsilon$ 2-GUS-F(PstI):     | GCTGCAGCTGTTCTCTGATCACCGGTTG          |
|                         | MAP3K $\epsilon$ 2-GUS-R(BamHI)     | CGGATCCctcttctcgtcagcaccaaac          |
|                         | pMAP3K $\epsilon$ 1-1300-F (PstI)   | agtgccaaagcttCTGCAGCCGTGTTACCAACCAAAG |
|                         | pMAP3K $\epsilon$ 1-1300-R (BamHI)  | CACCATGGTACCGGATCCctcttctcgtttcttctt  |

|             |                                         |                                        |
|-------------|-----------------------------------------|----------------------------------------|
|             | 1300-MAP3K $\epsilon$ 1-F(Sac I)        | GAGCTGTACAAGGAGCTCATGGCGCGGCAAATGACG   |
|             | 1300-MAP3K $\epsilon$ 1-R(Sac I)        | GAGCTGTACAAGGAGCTCATGGCGCGGCAAATGACG   |
|             | pMAP3K $\epsilon$ 2-1300-F (PstI)       | agtgccaaagcttCTGCAG CTGTTCTCTGATCACCGG |
|             | pMAP3K $\epsilon$ 2-1300-R (BamHI)      | CACCATGGTACCGGATCCctctttctcgtcagcacc   |
|             | 1300-MAP3K $\epsilon$ 2-F(Sac I)        | GAGCTGTACAAGGAGCTCATGGCGCGACAGATGACG   |
|             | 1300-MAP3K $\epsilon$ 2-R(Sac I)        | TCGGGGAAATTCGAGCTCTCACAAGATGGTGTTGAT   |
| Y2H assays  | MAP3K $\epsilon$ 1-AD-F(NdeI)           | CCAGATTACGCTCATATGATGGCGCGGCAAATGACG   |
|             | MAP3K $\epsilon$ 1-AD-R(EcoRI)          | CCCACCCGGGTGGAATTCTCACAATATTGTGTTGAT   |
|             | MAP3K $\epsilon$ 2-AD-F(NdeI)           | CCAGATTACGCTCATATGATGGCGCGACAGATGACG   |
|             | MAP3K $\epsilon$ 2-AD-R(EcoRI)          | CCCACCCGGGTGGAATTCTCACAAGATGGTGTTGAT   |
|             | MOB1A-CDS-BD-F(EcoRI_                   | CCGGAATTCATGAGTCTCTTTGGGTTAGG          |
|             | MOB1A-CDS-BD-R(BamHI)                   | CGCGGATCCTCAATAAGGTGAAATGATAG          |
|             | MOB1B-CDS-BD-F(EcoRI_                   | CCGGAATTCATGAGTCTATTCTGGGCTTGG         |
|             | MOB1B-CDS-BD-R(BamHI)                   | CGCGGATCCTTAGTAAGGTGCAATGATAG          |
| ColP assays | 1390-MAP3K $\epsilon$ 1-gfp-F ((BamHI ) | GGGATCCATGGCGCGGCAAATGACGTC            |

|            |                                              |                                |
|------------|----------------------------------------------|--------------------------------|
|            | 1390-<br>MAP3K $\epsilon$ 1-<br>gfp-R (KpnI) | GGGTACCCAATATTGTGTTGATGTGAAG   |
|            | 1390-<br>MAP3K $\epsilon$ 2-<br>gfp-F (Sall) | GGTCGACATGGCGCGACAGATGACGTC    |
|            | 1390-<br>MAP3K $\epsilon$ 2-<br>gfp-R (KpnI) | GGGTACCCAAGATGGTGTGTTGATGTGAAG |
| LCI assays | MAP3K $\epsilon$ 1-<br>cluc-F (KpnI)         | GGGTACCATGGCGCGGCAAATGACGTC    |
|            | MAP3K $\epsilon$ 1-<br>cluc-R<br>(BamHI)     | GGGATCCTCACAATATTGTGTTGATGTG   |
|            | MAP3K $\epsilon$ 2-<br>cluc-F(KpnI)          | GGGTACCATGGCGCGACAGATGACGTC    |
|            | MAP3K $\epsilon$ 2-<br>cluc-R (Sall)         | GGTCGACTCACAAGATGGTGTGTTGATGT  |
|            | MOB1A-nluc-<br>F(KpnI)                       | GGGTACCATGAGTCTCTTTGGGTTAGG    |
|            | MOB1A-nluc-<br>R(Sall)                       | GGTCGACATAAGGTGAAATGATAGATTCT  |
|            | MOB1B-nluc-<br>F (KpnI)                      | GGGTACCATGAGTCTATTCTGGGCTTGG   |
|            | MOB1B-nluc-<br>R (Sall)                      | GGTCGACGTAAGGTGCAATGATAGATTC   |
| RT-PCR     | NtACTIN-F                                    | CCACACAGGTGTGATGGTTG           |
|            | NtACTIN-R                                    | GTGGCTAACACCATCACCAG           |
|            | MAP3K $\epsilon$ 1-<br>RT-F                  | CTGAGAGGGATCGTTCTCGC           |
|            | MAP4K $\epsilon$ 1-<br>RT-R                  | GGGTGCAAAGCATCTGGTTG           |
|            | MAP3K $\epsilon$ 2-<br>RT-F                  | TGGAAAACATTGGTCAAGAGG          |
|            | MAP3K $\epsilon$ 2-<br>RT-R                  | AGGAATAGGAGGGGTATCATC          |
|            | MOB1A-RT-F                                   | AGAGTGCACCTTCTGGAAGC           |
|            | MOB1A-RT-<br>R                               | ATGAGCTCTTGTAGAGGCGC           |
|            | MOB1B-RT-F                                   | TTCCGTCCTAAGAAGAGCGC           |
|            | MOB1B-RT-<br>R                               | AGGAGCGAGTTCTTTCTTGTC          |

|         |                 |                       |
|---------|-----------------|-----------------------|
| qRT-PCR | ACT2-qPCR-FP    | GATGCCCAGAAGTCTTGTTCC |
|         | ACT2-qPCR-RP    | TGCTCATACGGTCAGCGATAC |
|         | LOX3-qPCR-FP    | GAAATCAATGCTTTGGCTAG  |
|         | LOX3-qPCR-RP1   | AAGACCGTCGTTGGCGTA    |
|         | LOX4-qPCR-FP    | TGCTTCACTGCTGGTCAATA  |
|         | LOX4-qPCR-RP1   | ACCGTCGTTGGCGTATGG    |
|         | LOX6-qPCR-FP    | TCCTGCTGATCTTGTTCCG   |
|         | LOX6-qPCR-RP1   | GCTCAAGGTCAGATGTTATG  |
|         | AOS-qPCR-FP     | CGGTTACGGCTCAATACG    |
|         | AOS-qPCR-RP1    | TCTCCGGCACAACACTCAT   |
|         | AOC1-qPCR-FP    | AGAACTTGGGAAATACCG    |
|         | AOC1-qPCR-RP1   | GTTTGTGAATGGGACGAG    |
|         | AOC2-qPCR-FP    | TCACTGCCAAGAAGAACC    |
|         | AOC2-qPCR-RP1   | CTCCGAGACCGAACATTA    |
|         | AOC3-qPCR-FP    | CTCGTAATCATCAATCTCAC  |
|         | AOC3-qPCR-RP1   | ACTGCTGGACTGTTTCTAT   |
|         | OPR3-qPCR-FP    | GGCGTTGGCAGAGTATTA    |
|         | OPR3-qPCR-RP1   | AAACCTCCCTTAGCGTGA    |
|         | CYP94B3-qPCR-FP | ATTAGTGCTCGCCGTGCCA   |
|         | CYP94B3-qPCR-RP | TTGCTTTGCTTCTGCTCC    |
|         | JOX3-qPCR-FP    | ATCTCCATTACCAGCCTTCG  |

|               |                         |
|---------------|-------------------------|
| JOX3-qPCR-RP  | ATCCACCTGATTCCTCTTTACC  |
| JAR1-qPCR-FP  | CTCACTGGTCACCCTGTTCC    |
| JAR1-qPCR-RP  | TCCCGTTGATATGTA CTGCTTG |
| JAZ1-qPCR-FP  | CGGGCAAGTGATTGTATT      |
| JAZ1-qPCR-RP  | GAGGATTGGATTGGCTCT      |
| JAZ2-qPCR-FP  | AATGATGAATCTGTTCCCTT    |
| JAZ2-qPCR-RP  | CACCATAACTCGACCACC      |
| JAZ5-qPCR-FP  | CCTGATCTCAATGAGCCTAC    |
| JAZ5-qPCR-RP  | CGATGATGACCTGCGTTT      |
| JAZ9-qPCR-FP  | ACACTGCTGCTACCTCATCA    |
| JAZ9-qPCR-RP  | CTCATAAGCCTCTCTTTGCG    |
| JAZ10-qPCR-FP | CGATTTCTCGGACTTGA       |
| JAZ10-qPCR-RP | CTTCCCTCGGAGTAGACG      |
| MYC2-qPCR-FP  | GAACGAAGATAAAGTTCTATCA  |
| MYC2-qPCR-RP  | CAACCGCTCGTAACGCGTAGA   |
| GSL2- qPCR-FP | ACGAGAAGTTTGCAGAGAACTA  |
| GSL2- qPCR-RP | CTCTGCTGCTTTCCCATAAATC  |
| GSL5- qPCR-FP | CAAGCAATGAAGACTTCTACCG  |
| GSL5- qPCR-RP | ATTACTGAAGAAAGCAATCCGC  |
| GSL7- qPCR-FP | CCTTGGTTTCTTGTCAGTCATG  |
| GSL7- qPCR-RP | CTAATCCTTTGAACACGCTACG  |



|                   |                         |
|-------------------|-------------------------|
| GSL9- qPCR-FP     | ATTGCATGAGTTGTGCTGTTAG  |
| GSL9- qPCR-RP     | TTGCAGCACATATTCAGTTAGC  |
| AT5G20330-qPCR-FP | ATCGAGTCTTACTTAGCTGACG  |
| AT5G20330-qPCR-RP | TAGGTTGGTTAGAGACTGCATG  |
| AT5G20340-qPCR-FP | TTGTTCTTCTTCTCGTGCAATTG |
| AT5G20340-qPCR-RP | CGTTAAGAACCTCAGTGTTTGG  |
| AT5G20390-qPCR-FP | CTATCCTCGTCAACATCTACCC  |
| AT5G20390-qPCR-RP | GTTGGTGTTGAAGATGGCATAG  |
| AT5G64790-qPCR-FP | AAACGTGACCCAGTATATTCGT  |
| AT5G64790-qPCR-RP | TGTGAATGTTCTTTAACGCTGG  |
| AT1G33220-qPCR-FP | AACCTTTACAAGTCCATAGGCA  |
| AT1G33220-qPCR-RP | GTGACTTCAATATTACGGTGGC  |
